# Supplementary material for: Association between mobile phone use and self-reported well-being in children: a questionnaire-based cross-sectional study in Chongqing, China
Source: HighWire-hosted journal article supplement (doi:10.1136/bmjopen-2014-007302), 2015-05-01
Supplement: bmjopen-2014-007302supp2.pdf [file bmjopen-2014-007302supp2.pdf]

# Supplement 2 调查问卷

调查日期: \_\_\_/\_\_\_/\_\_\_(年/月/日)

---

## A. 人口统计学信息 (请阅读下列问题。选择或在括号内填写您认为最合适的答案。)

- A1 您的姓名? ( )  
A2 您的性别? 1=男性 2=女性  
A3 您的出生年月? ( / / ) (年/月/日)  
A4 您的身高? ( ) 米  
A5 您的体重? ( ) 千克  
A6 您目前就读的学校? ( )  
A7 您的家庭居住地址? ( )  
A8 您的手机号码? ( )
- 

---

## B. 手机使用信息 (请阅读下列问题。选择或在括号内填写您认为最合适的答案。下列问题中涉及的使用手机均包括使用他人的手机。)

- B1 您是否使用手机? 1=是 2=否  
B2 您使用手机多少年? ( ) 年  
B3 您每天使用手机打电话的时间? ( ) 分钟/天
- 

---

## C. 健康症状 (请阅读下列问题。选择最符合您过去 6 个月健康状况的答案。)

- C1 您是否感觉到头痛?  
1=几乎没有 2=每月一次 3=每周一次 4=每周几次 5=几乎每天  
C2 您是否感觉到头晕?  
1=几乎没有 2=每月一次 3=每周一次 4=每周几次 5=几乎每天  
C3 您是否感觉到疲劳?  
1=几乎没有 2=每月一次 3=每周一次 4=每周几次 5=几乎每天  
C4 您是否感觉到睡眠不足?  
1=几乎没有 2=每月一次 3=每周一次 4=每周几次 5=几乎每天  
C5 您是否感觉到情绪低落?  
1=几乎没有 2=每月一次 3=每周一次 4=每周几次 5=几乎每天  
C6 您是否感觉到心跳加速?  
1=几乎没有 2=每月一次 3=每周一次 4=每周几次 5=几乎每天
- 

---

## D. 其他 (请阅读下列问题。选择您认为最合适的答案。)

- D1 您是否有学业压力? 1=是 2=否  
D2 您是否每天进行体育锻炼? 1=是 2=否
-
